# Supplementary material for: Immune system-associated genes increase malignant progression and can be used to predict clinical outcome in patients with hepatocellular carcinoma
Source: PubMed Central journal article supplement — Int J Oncol. 2020 Feb 24;56(5):1199–211. doi: 10.3892/ijo.2020.4998 (PMC7115743; doi:10.3892/ijo.2020.4998), 2020-02-24

Figure S1. Differences in DFS between patients stratified by IRS based on stage or grade from TCGA. DFS curves of patients (A) in the entire TCGA cohort, or with (B) stage I & II, (C) stage III, (D) grade 1 & 2 or (E) grade 3 & 4. DFS, disease free survival; IRS, immune risk score; CI, confidence interval; TCGA, The Cancer genome Atlas.

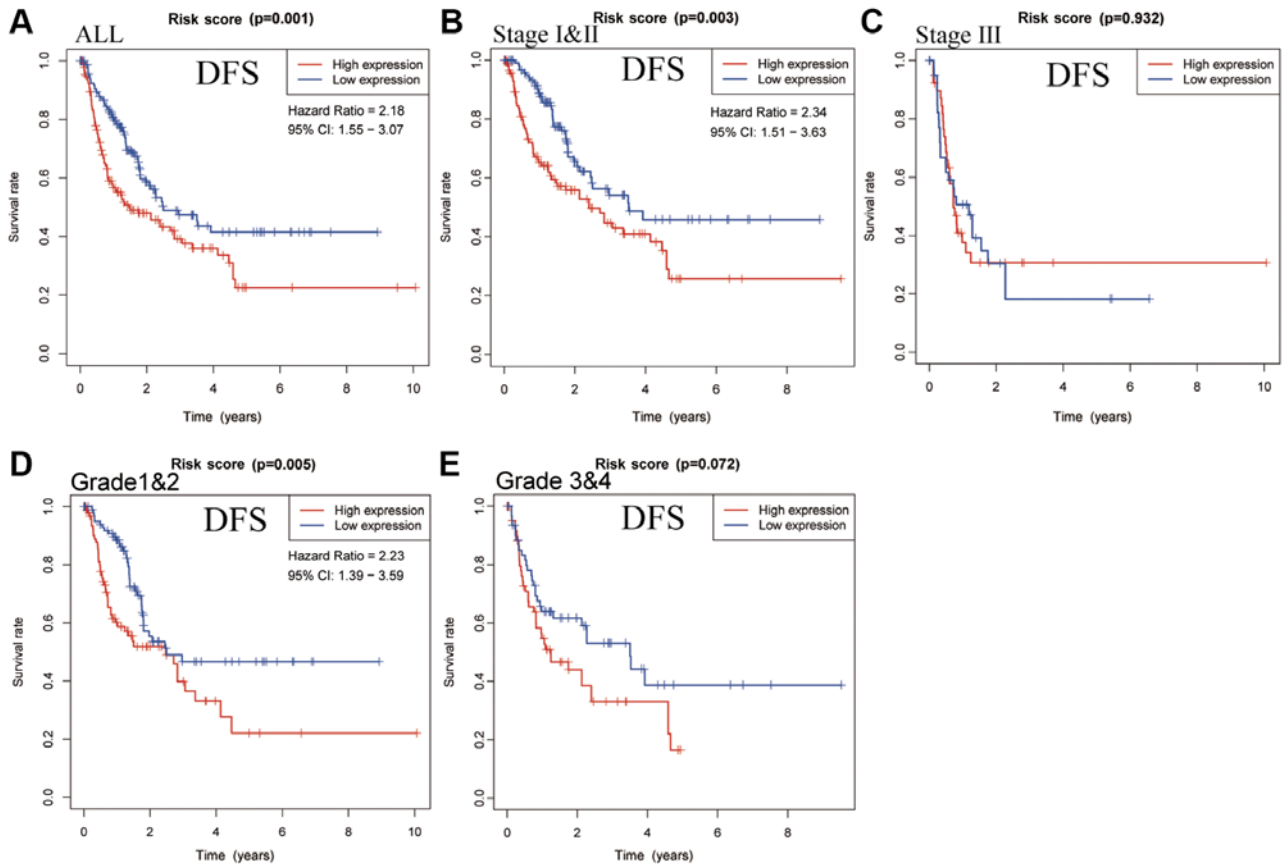

Supplement: Supplementary_Data.pdf [file Supplementary_Data.pdf]
